# Supplementary material for: Cancer upregulated gene 2 induces epithelial-mesenchymal transition of human lung cancer cells via TGF-β signaling
Source: PubMed Central journal article supplement (PMC5354895; doi:10.18632/oncotarget.13867), 2016-12-10
Supplement: oncotarget-08-5092-s001.pdf [file oncotarget-08-5092-s001.pdf]

## Cancer upregulated gene 2 induces epithelial-mesenchymal transition of human lung cancer cells via TGF- $\beta$ signaling

### SUPPLEMENTARY FIGURES

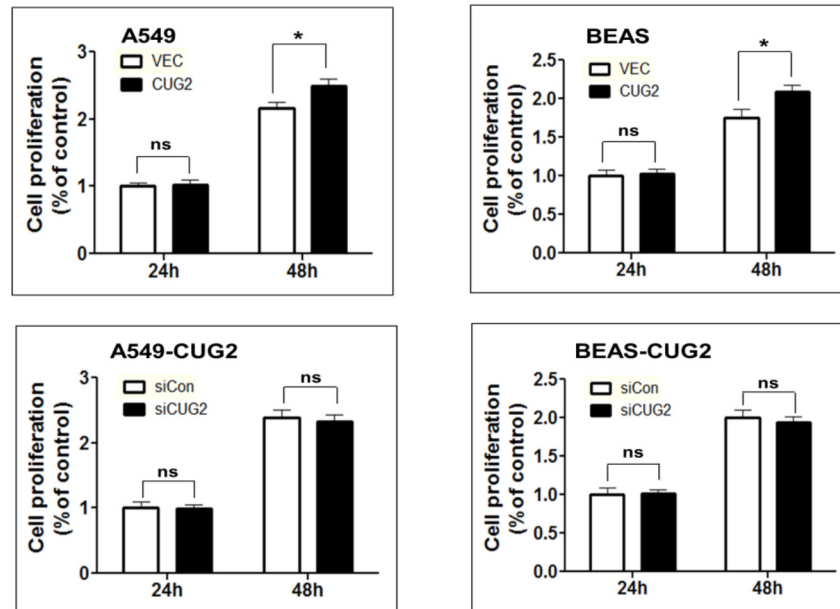

**Supplementary Figure S1: No difference of cell growth between CUG2 overexpressing cells and their control cells during 24 h.** A549-CUG2, BEAS-CUG2 and their control cells were inoculated at  $1 \times 10^5$  cells per well using a 12-well plate. We set 12 h post-inoculation as an initiation time for the measurement of cell growth. At 12 h post-inoculation, CUG2 siRNA (500 nM) or control siRNA (500 nM) was added. (siCon; Control siRNA, siCUG2; CUG2 siRNA) MTT assays were performed for measuring cell growth at 24 and 48 h. Dye solution containing tetrazolium was added to the cells in the plates and incubated for 2 h. The absorbance of the formazan produced by living cells was measured at 570 nm. The results were presented as the mean  $\pm$  standard deviation (SD) of three independent experiments performed in triplicate. (ns: not significant;  $p > 0.05$ , \* ;  $p < 0.05$ ).

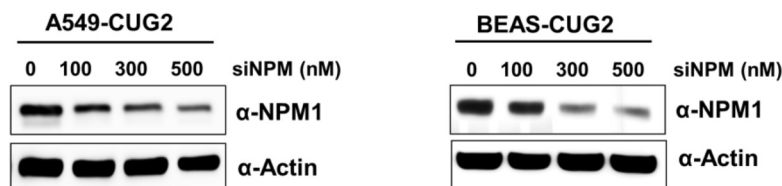

**Supplementary Figure S2: Optimization of NPM1 siRNA concentration for NPM1 silence.** A549-CUG2 and BEAS-CUG2 cells were treated with siNPM1 at the different doses (100, 300, and 500 nM) at 12 h post-inoculation. (siNPM1; NPM siRNA) At 48 h post-treatment, the cells were harvested and prepared for cell lysates. Down-regulation of NPM1 was detected by immunoblotting.

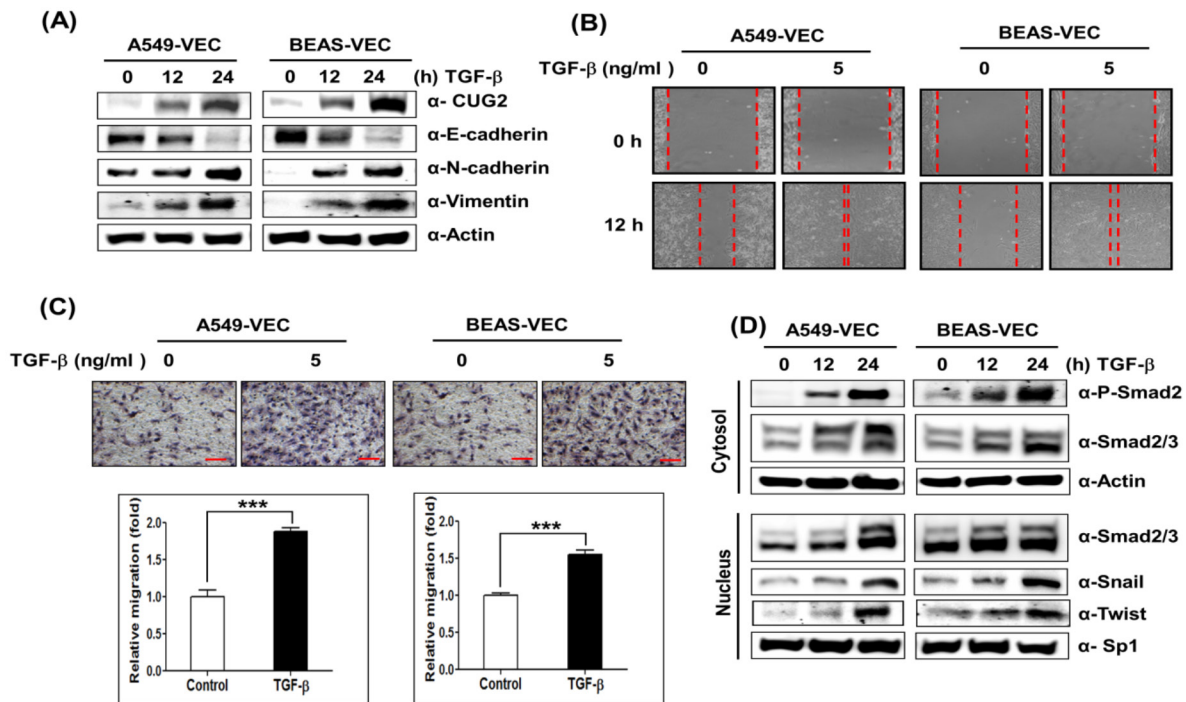

**Supplementary Figure S3: TGF- $\beta$ 1 treatment induces EMT in A549-Vec and BEAS-Vec cells.** **A.** Expression of CUG2, E-cadherin, N-cadherin, and vimentin in A549-Vec and BEAS-Vec cells was detected by immunoblotting at 12 h and 24 h post-treatment with TGF- $\beta$ 1 (5 ng/mL). **B.** Cell migration was measured in A549-Vec and BEAS-Vec cells at 24 h post-treatment with TGF- $\beta$ 1 (5 ng/mL) by a wound healing assay. The assays were repeated twice. **C.** An invasion assay was performed with A549-Vec and BEAS-Vec cells at 24 h post-treatment with TGF- $\beta$ 1 (5 ng/mL). The assays were repeated twice. Each assay was performed in triplicate and error bars indicate SD. (\*\*\*)  $p < 0.001$ ). **D.** A549-Vec and BEAS-Vec cells were treated with TGF- $\beta$ 1 (5 ng/mL) for 12 h and 24 h. The cells were fractionated into cytosolic and nuclear extracts. Expression of phospho-Smad2, Smad2/3, Snail, and Twist was detected by immunoblotting. Sp1 and actin were used loading controls for nuclear and cytosolic extracts, respectively.

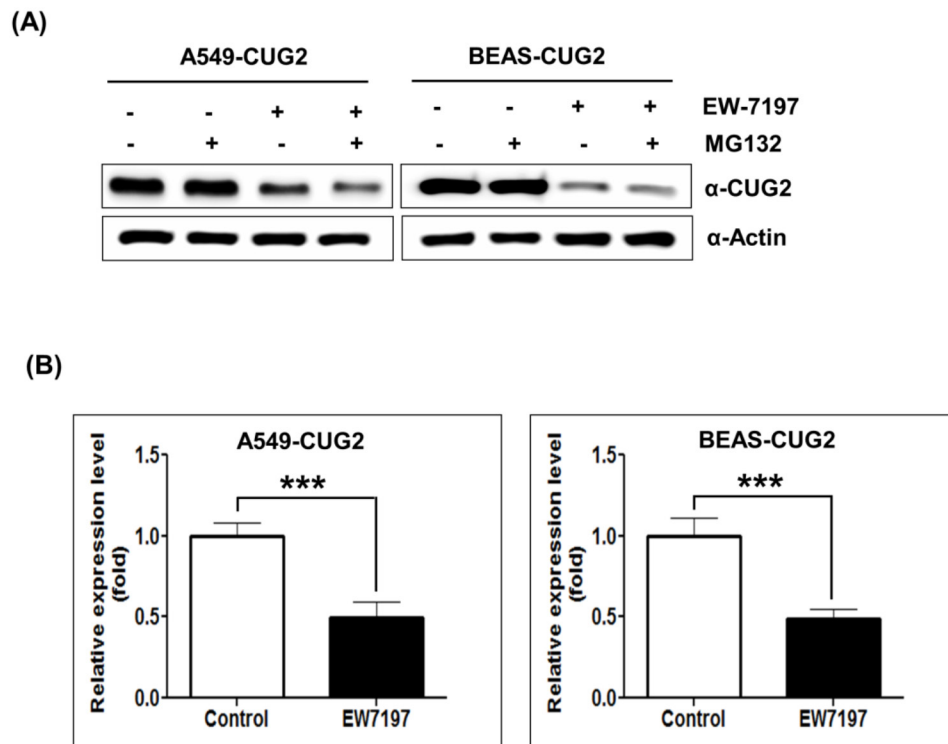

**Supplementary Figure S4: EW-7197 treatment decreases CUG2 expression at the transcriptional level but not at the protein level.** **A.** A549-CUG2 and BEAS-CUG2 cells were treated with EW-7197 (1.25  $\mu$ M) and incubated for 48 h. At 8 h before harvest, MG132 (2  $\mu$ M) was added in the cells and the cells were prepared for the detection of CUG2 protein levels by immunoblotting. **B.** A549-CUG2 and BEAS-CUG2 cells were treated with EW-7197 (1.25  $\mu$ M) and at 24 h post-treatment, the cells were harvest for isolation of total RNAs. After synthesis of cDNAs, qRT-PCR was performed. The assay was repeated twice. Each assay was performed in triplicate. Error bars indicates SD. (\*\*\*, $p$ <0.001).

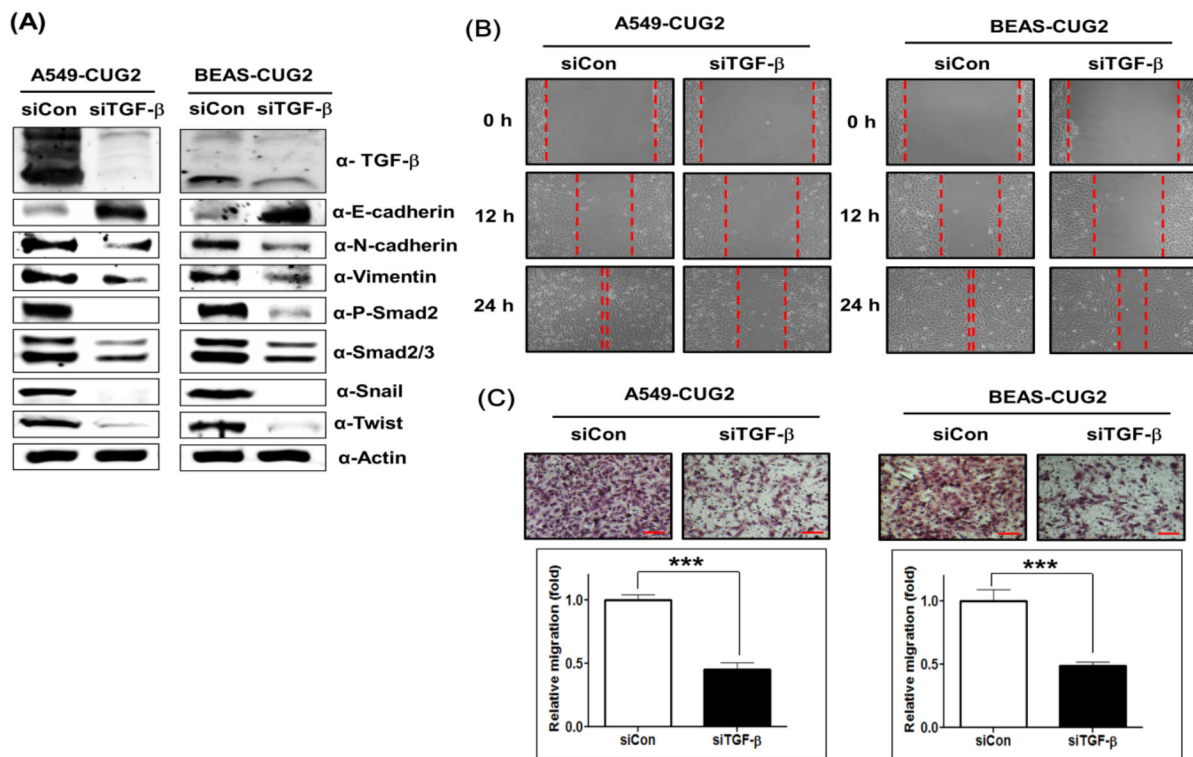

**Supplementary Figure S5: TGF- $\beta$ 1 silencing inhibits the CUG2-induced EMT.** **A.** At 48 h post-treatment with TGF- $\beta$ 1 siRNA (500 nM), expression of TGF- $\beta$ , E-cadherin, N-cadherin, vimentin, phospho-Smad2, Smad2/3, Snail, and Twist in A549-CUG2 and BEAS-CUG2 cells was detected by immunoblotting. (siCon; control siRNA, siTGF- $\beta$ 1; TGF- $\beta$ 1 siRNA) **B.** Cell migration was measured by a wound healing assay in A549-CUG2 and BEAS-CUG2 cells at 48 h post-treatment with TGF- $\beta$ 1 siRNA. The wound closure areas were monitored by phase-contrast microscopy at a magnification of 100 $\times$ . The assays were repeated twice. **C.** An invasion assay was performed with A549-CUG2 and BEAS-CUG2 at 48 h post-treatment with TGF- $\beta$ 1 siRNA. Scale bar indicates 100  $\mu$ m. The assays were repeated twice. Each assay was performed in triplicate and error bars indicate SD. (\*\*\*,  $p < 0.001$ ).

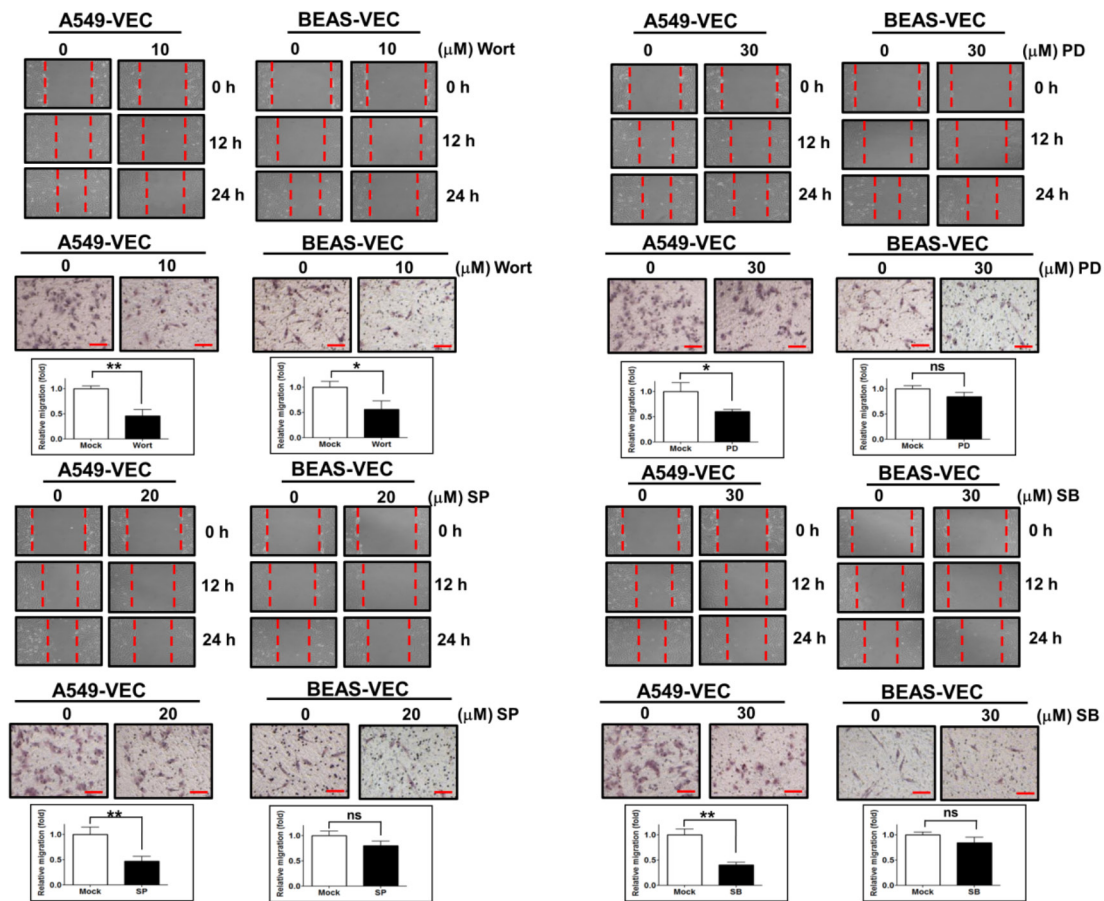

**Supplementary Figure S6: Treatment with Akt or MAPK inhibitor marginally reduces EMT in A549-Vec and BEAS-Vec cells.** A549-CUG2 and BEAS-CUG2 cells were treated with wortmannin (Wort), PD98059 (PD), SP600125 (SP), or SB203580 (SB). A wound healing assay was performed for cell migration. The wound closure areas were monitored by phase-contrast microscopy at a magnification of 100 $\times$ . The assay was repeated twice. Cell invasion assay was performed using 48-well Boyden chambers. The chamber was assembled using polycarbonate filters coated with Matrigel. The assay was repeated twice. Each assay was performed in triplicate. Error bar indicates SD. (ns;  $p > 0.05$ , \*;  $p < 0.05$ , \*\*;  $p < 0.01$ ).

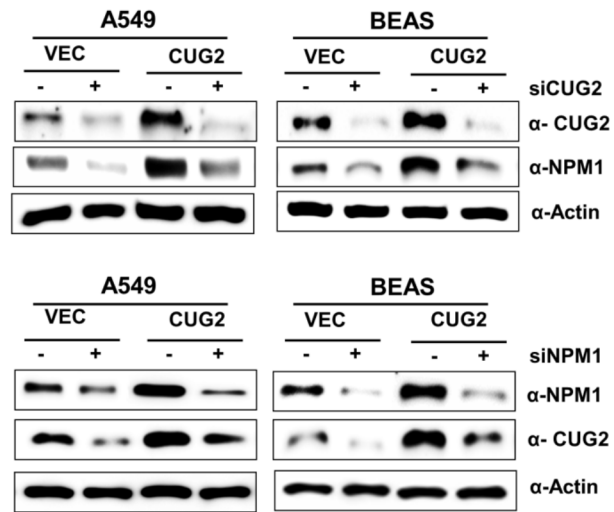

**Supplementary Figure S7: Expression of both CUG2 and NPM1 shows interdependence.** A549-CUG2 and BEAS-CUG2 cells were treated with CUG2 siRNA (500 nM) or NPM1 siRNA (500 nM). At 48 h post-treatment, the cells were harvested and CUG2 and NPM1 protein levels were detected by immunoblotting. (siCUG2; CUG2 siRNA, siNPM1; NPM1 siRNA).
